# Supplementary material for: Soil organic carbon stabilization mechanisms and temperature sensitivity in old terraced soils
Source: Copernicus journal article supplement (doi:10.5194/bg-18-6301-2021), 2021-12-08
Supplement: Supplementary file 1 [file bg-18-6301-2021-supplement.zip]

Archive with 4 entries (3 files):
- Supplementary material_Zhao et al/
- Supplementary material_Zhao et al/BG_Terrace_SOC_DATA.xlsx
- Supplementary material_Zhao et al/Support information.docx
- bg-18-6301-2021-supplement-title-page.pdf
