# Supplementary material for: Soil organic carbon stabilization mechanisms and temperature sensitivity in old terraced soils
Source: Copernicus journal article supplement (doi:10.5194/bg-18-6301-2021), 2021-12-08
Supplement: Supplementary file 1 [file bg-18-6301-2021-supplement.zip › bg-18-6301-2021-supplement-title-page.pdf]

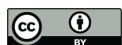

## *Supplement of*

# **Soil organic carbon stabilization mechanisms and temperature sensitivity in old terraced soils**

**Pengzhi Zhao et al.**

*Correspondence to:* Pengzhi Zhao ([pengzhi.zhao@uclouvain.be](mailto:pengzhi.zhao@uclouvain.be))

- [bg-18-6301-2021-supplement-title-page.pdf](#)
- [Supplementary material\\_Zhao et al](#)
  - [BG\\_Terrace\\_SOC\\_DATA.xlsx](#)
  - [Support information.docx](#)

The copyright of individual parts of the supplement might differ from the article licence.
