# Supplementary material for: Soil organic carbon stabilization mechanisms and temperature sensitivity in old terraced soils
Source: Copernicus journal article supplement (doi:10.5194/bg-18-6301-2021), 2021-12-08
Supplement: Supplementary file 1 [file bg-18-6301-2021-supplement.zip › Supplementary material_Zhao et al/BG_Terrace_SOC_DATA.xlsx]

## Sheet: Overview
Supplementary material_dataset
SOC stabilization mechanisms and temperature sensitivity in old terraced soils
Pengzhi Zhao1, Daniel J. Fallu2, Sara Cucchiaro3,4, Paolo Tarolli3, Clive Waddington5, David Cockcroft5, Lisa Snape6, Andreas Lang6, Sebastian Doetterl7, Antony G. Brown2,8, Kristof Van Oost1
1Georges Lemaître Centre for Earth and Climate Research, Earth and Life Institute, UCLouvain, 1348 Louvain-la-Neuve, Belgium
2Tromso University Museum, UiT The Artic University of Norway, Kvaløyen 30, 9013 Tromsø, Norway
3Department of Agricultural, Food, Environmental and Animal Sciences, University of Udine, Via delle Scienze, 206, 33100 Udine, Italy
4Department of Land, Environment, Agriculture and Forestry, University of Padova, viale dell’Università 16, 35020 Legnaro, Italy
5Archaeological Research Services, Ltd, Angel House, Portland Square, Bakewell DE45 1HB, UK
6Department of Geography and Geology, University of Salzburg, Salzburg, 5020, Austria
7Department of Environmental Systems Science, ETH Zurich, Universitätstrasse 16, 8092 Zürich, Switzerland
8Geography and Environmental Science, University of Southampton, Highfield SO17 1BJ, Southampton, UK
Sampling site: Northumberland National Park (55° 26' 26.14" N, 1° 59'4 9.52" W), UK
Sampling date: May 2019
abbreviations:
soil organic carbon (SOC)
SOC temperature sensitivity (Q10)
specific potential maximum heterotrophic respiration (SPR)
coarse particulate organic carbon (cPOM)
microaggregate-associated SOC (M)
non-aggregated silt and clay SOC (S+C)
portable optically stimulated luminescence (pOSL)

## Sheet: SOC
Profiles	SOC%	depth/cm
Control C1	7.42102	5
Control C1	7.44347	10
Control C1	3.41863	15
Control C1	3.19961	20
Control C1	3.68476	25
Control C1	2.50347	30
Control C1	2.04372	35
Control C1	1.80263	40
Control C1	1.45743	45
Control C1	0.352214	50
Control C1	1.16292	55
Control C1	0.6884	60
Control C1	0.213882	70
Control C2	12.251	5
Control C2	9.0735	10
Control C2	7.70638	20
Control C2	6.28139	25
Control C2	5.80043	30
Control C2	7.14307	35
Control C2	6.19199	40
Control C2	1.09603	45
Terrace P1	10.9834	5
Terrace P1	8.05725	10
Terrace P1	5.03427	15
Terrace P1	5.9125	20
Terrace P1	4.93195	25
Terrace P1	5.09138	30
Terrace P1	1.80046	70
Terrace P1	1.4103	100
Terrace P1	1.58174	110
Terrace P1	2.81318	130
Terrace P1	0.875211	160
Terrace P1	0.384585	190
Terrace P2	11.2046	5
Terrace P2	8.285	10
Terrace P2	5.68479	15
Terrace P2	4.31243	20
Terrace P2	4.6728	25
Terrace P2	3.12349	30
Terrace P2	3.0272	35
Terrace P2	1.59372	40
Terrace P2	2.16035	45
Terrace P2	1.35475	50
Terrace P2	1.773	55
Terrace P2	1.6959	60
Terrace P2	1.65742	65
Terrace P2	1.73697	70
Terrace P2	1.34654	80
Terrace P2	1.99449	85
Terrace P2	1.22149	90
Terrace P2	0.863572	100
Terrace P2	0.8352	120
Terrace P2	0.592516	150
Terrace P3	10.6079	5
Terrace P3	7.51593	10
Terrace P3	4.35215	15
Terrace P3	3.74496	20
Terrace P3	4.52507	25
Terrace P3	4.37947	30
Terrace P3	2.58273	35
Terrace P3	3.80504	40
Terrace P3	3.43564	45
Terrace P3	2.02337	50
Terrace P3	2.27272	55
Terrace P3	1.75865	60
Terrace P3	1.80124	65
Terrace P3	1.69812	70
Terrace P3	1.30472	75
Terrace P3	2.05582	80
Terrace P4	9.02417	5
Terrace P4	7.05654	10
Terrace P4	4.91554	15
Terrace P4	5.34359	20
Terrace P4	3.86375	25
Terrace P4	2.84449	30
Terrace P4	3.31069	35
Terrace P4	3.16755	40
Terrace P4	1.67282	45
Terrace P4	2.38082	50
Terrace P4	1.56514	55
Terrace P4	2.15561	60
Terrace P4	2.05496	70
Terrace P4	0.684773	75
Terrace P4	0.685987	80
Terrace P4	1.08796	90

## Sheet: Incuabtion
profile	depth	Q10	Q10_sd	SPR	SPR_sd
		μgC h-1 gSOC-1		μgC h-1 gSOC-1
C1	0-10	5.161	1.09996	11.7657	0.61533
C1	30-45	1.94495	0.169972	7.28812	0.356269
C1	60-70	1.78725	0.112944	7.78068	0.411421
C2	0-10	4.34857	1.12161	8.78102	0.760472
C2	30-45	2.30387	0.272221	5.94554	0.661576
Terrace P1	0-10	7.89182	2.29227	7.18262	0.188904
Terrace P1	50-70	1.24931	0.035041	4.98259	0.318722
Terrace P1	90-100	1.82278	0.24835	5.90039	0.30261
Terrace P1	140-150	2.57341	0.384123	6.40934	0.188904
Terrace P2	0-10	4.35197	0.825265	7.22941	1.18963
Terrace P2	30-45	2.27534	0.451446	7.29959	0.357593
Terrace P2	60-70	2.0004	0.341594	5.51059	0.62364
Terrace P2	80-90	2.46273	0.520996	4.59438	0.096105
Terrace P3	0-10	4.21815	0.361651	6.96948	0.467423
Terrace P3	30-45	3.03469	0.178155	6.71961	0.131084
Terrace P3	60-70	2.40605	0.429287	4.7747	0.146099
Terrace P4	0-10	4.35372	0.880374	9.34924	0.762621
Terrace P4	30-45	3.21997	0.197007	7.417	0.524986
Terrace P4	60-70	1.04932	0.158276	5.34515	0.0635264

## Sheet: SOC fraction
profile	depth/cm	cPOM%	cPOM_sd	M%	M_sd	S+C%	S+C_sd
Control C1	0-10	28.7664	6.85175	56.7049	4.05688	14.5287	2.79487
Control C1	30-45	13.0506	8.17424	60.8557	4.27774	26.0937	3.8965
Control C1	60-70	7.95297	2.39875	46.1307	0.810467	45.9163	1.58828
Control C2	0-10	29.9363	10.1232	57.9852	7.44511	12.0785	2.6781
Control C2	30-45	10.7002	2.84286	60.072	0.640066	29.2278	2.2028
Terrace P1	0-10	38.8408	2.9785	47.5492	1.2274	13.6099	1.75111
Terrace P1	50-70	16.9976	3.1163	48.0336	1.88488	34.9688	1.23142
Terrace P1	90-100	14.4987	4.5141	48.512	4.40568	36.9894	8.91979
Terrace P1	140-150	12.1105	6.68137	52.8826	3.17664	35.0068	3.50473
Terrace P2	0-10	29.3335	3.74198	59.5896	1.98671	11.0769	1.75527
Terrace P2	30-45	17.3236	2.0547	59.8003	1.16306	22.8762	3.21776
Terrace P2	60-70	23.6175	0.684348	48.8684	0.318691	27.5141	0.365657
Terrace P2	80-90	6.71873	2.20108	53.8945	1.56101	39.3867	0.64007
Terrace P3	0-10	39.9227	3.53725	50.2969	1.94824	9.7804	1.58901
Terrace P3	30-45	25.6216	1.85904	56.5076	0.876443	17.8708	2.73548
Terrace P3	60-70	14.9002	2.16329	55.6074	0.496138	29.4924	1.66715
Terrace P4	0-10	50.7663	2.28487	40.3325	1.16579	8.90119	3.45066
Terrace P4	30-45	29.7742	2.9328	49.6956	2.48107	20.5302	0.451725
Terrace P4	60-70	6.34828	0.550452	56.1024	2.01533	37.5493	1.46488

## Sheet: pOSL
profile	Depth/cm	pOSL age counts
Terrace P1	5	17964
Terrace P1	10	35215
Terrace P1	15	32274
Terrace P1	20	41348
Terrace P1	25	68198
Terrace P1	30	52367
Terrace P1	35	58606
Terrace P1	40	69556
Terrace P1	45	95308
Terrace P1	50	109883
Terrace P1	55	111660
Terrace P1	60	101598
Terrace P1	65	102665
Terrace P1	70	136442
Terrace P1	75	136469
Terrace P1	80	167463
Terrace P1	85	222588
Terrace P1	90	232170
Terrace P1	95	279286
Terrace P1	100	190431
Terrace P1	105	227219
Terrace P1	110	220833
Terrace P1	115	183726
Terrace P1	120	153616
Terrace P1	125	181212
Terrace P1	130	277617
Terrace P1	135	491100
Terrace P1	140	203231
Terrace P1	145	275215
Terrace P1	150	332485
Terrace P1	155	401642
Terrace P1	160	392783
Terrace P1	165	579953
Terrace P1	170	439902
Terrace P1	175	302803
Terrace P2	10	5549
Terrace P2	20	4442
Terrace P2	30	8482
Terrace P2	40	8952
Terrace P2	50	15290
Terrace P2	60	15604
Terrace P2	70	40224
Terrace P2	80	56423
Terrace P2	90	111096
Terrace P2	100	174590
Terrace P2	110	214860
Terrace P2	120	174237
Terrace P2	130	167342
Terrace P3	5	2568
Terrace P3	10	3221
Terrace P3	15	2956
Terrace P3	20	6463
Terrace P3	25	6684
Terrace P3	30	5769
Terrace P3	35	6396
Terrace P3	40	7506
Terrace P3	45	9743
Terrace P3	50	15883
Terrace P3	55	14531
Terrace P3	60	29294
Terrace P3	65	37352
Terrace P3	70	85057
Terrace P3	75	138353
Terrace P3	80	274354
Terrace P4	5	14361
Terrace P4	10	17268
Terrace P4	15	20630
Terrace P4	20	24832
Terrace P4	25	34185
Terrace P4	30	48479
Terrace P4	35	51490
Terrace P4	40	63988
Terrace P4	45	48194
Terrace P4	50	102081
Terrace P4	55	90073
Terrace P4	60	97007
Terrace P4	65	99246
Terrace P4	70	152976
Terrace P4	75	191058
Terrace P4	80	189270
Terrace P4	85	612574
Terrace P4	90	368699
Terrace P4	95	637015

## Sheet: pH and texture
profile	depth/cm	pH	sand%	silt%	clay%
Control C1	0-10	3.42	35.3	56.04	8.66
Control C1	30-45	3.9	43.5	44.6	11.9
Control C1	60-70	3.97	44.2	43.4	12.4
Control C2	0-10	3.13	58.2	39.6	2.74
Control C2	30-45	3.77	48.3	42.21	9.49
Terrace P1	0-10	3.42	31.2	61.3	7.5
Terrace P1	50-70	3.81	26.8	58	15.2
Terrace P1	90-100	3.83	43	42.1	14.9
Terrace P1	140-150	3.97	54.4	34.7	10.9
Terrace P2	0-10	3.49	42.7	50.15	7.15
Terrace P2	30-45	3.73	34.7	51.3	14
Terrace P2	60-70	3.72	32.5	50	17.5
Terrace P2	80-90	3.86	52.2	37.5	10.3
Terrace P3	0-10	2.97	30.5	59.62	9.88
Terrace P3	30-45	3.78	35.5	50.9	13.6
Terrace P3	60-70	3.94	47.5	41.4	11.1
Terrace P4	0-10	3.35	39.9	51.58	8.52
Terrace P4	30-45	4.06	38.7	46.9	14.4
Terrace P4	60-70	4.42	37.3	47.7	15
